# Supplementary material for: The Contemporary Safety and Effectiveness of Lower Extremity Bypass Surgery and Peripheral Endovascular Interventions in the Treatment of Symptomatic Peripheral Arterial Disease
Source: PubMed Central journal article supplement — Circulation. 2015 Nov 23;132(21):1999–2011. doi: 10.1161/CIRCULATIONAHA.114.013440 (PMC4652630; doi:10.1161/circulationaha.114.013440), 2015-11-23
Supplement: cir-132-1999-s002.pdf [file cir-132-1999-s002.pdf]

## SUPPLEMENTAL MATERIAL

**Supplemental Table 1: Outcome definitions**

| Outcome                          | Codes and other criteria                                                                                                                   | Source data                                                                                                   |
|----------------------------------|--------------------------------------------------------------------------------------------------------------------------------------------|---------------------------------------------------------------------------------------------------------------|
| Limb revascularization           | Inclusive list of > 60 ICD9 and CPT4 codes identified potential PAD procedures of interest: charts pulled and reviewed by vascular experts | Hospital and outpatient procedure codes after PAD procedure; Electronic medical records used for confirmation |
| Minor lower extremity amputation | ICD-9 procedure codes 84.11, CPT4 codes 28800, 28805, 28810, 28820, 28825                                                                  | Hospital and outpatient procedure codes after PAD procedure                                                   |
| Major lower extremity amputation | ICD-9 procedure codes 84.10, 84.12-84.18<br>CPT4 codes 27590, 27591, 27592, 27598, 27880, 27881, 27882, 27888, 27889                       | Hospital procedure codes after PAD procedure                                                                  |
| Myocardial Infarction            | ICD-9 diagnosis codes: 410.xx                                                                                                              | Primary hospital discharge diagnosis after PAD procedure                                                      |
| Stroke                           | ICD-9 diagnosis codes: 433.xx, 434.xx, 436.xx                                                                                              | Primary hospital discharge diagnosis after PAD procedure                                                      |
| Mortality                        | All cause mortality                                                                                                                        | Membership death records and state health department resources                                                |

**Supplemental Table 2: Complication details by procedure type, all indications**

|                                                                   | Peripheral endovascular intervention (N=883) |     | Lower extremity bypass (N=975) |      |
|-------------------------------------------------------------------|----------------------------------------------|-----|--------------------------------|------|
|                                                                   | N                                            | %   | N                              | %    |
| <b>Periprocedural complications (in OR or in-lab)</b>             |                                              |     |                                |      |
| Any periprocedural complication (1 or more)                       | 49                                           | 5.5 | 47                             | 4.8  |
| Major periprocedural complication (1 or more of 5 listed below)   | 21                                           | 2.4 | 12                             | 1.2  |
| Death during procedure                                            | 0                                            | 0   | 0                              | 0    |
| CVA / stroke during procedure                                     | 0                                            | 0   | 0                              | 0    |
| Vessel perforation or rupture during procedure                    | 8                                            | 0.9 | 1                              | 0.1  |
| Abrupt closure                                                    | 11                                           | 1.2 | 8                              | 0.8  |
| Emergent vascular procedure                                       | 5                                            | 0.6 | 5                              | 0.5  |
| Other periprocedural complication (1 or more of 6 listed below)   | 39                                           | 4.4 | 42                             | 4.3  |
| Dissection remote to treatment site                               | 8                                            | 0.9 | 1                              | 0.1  |
| Embolus during procedure                                          | 17                                           | 1.9 | 2                              | 0.2  |
| Thrombosis during procedure                                       | 12                                           | 1.4 | 6                              | 0.6  |
| Vascular access complication                                      | 5                                            | 0.6 | 2                              | 0.2  |
| Contrast reaction                                                 | 1                                            | 0.1 | 0                              | 0    |
| Blood transfusion during procedure                                | 1                                            | 0.1 | 32                             | 3.3  |
| Other OR or in-lab complication                                   | 3                                            | 0.3 | 5                              | 0.5  |
| <b>Post-procedure, pre-discharge complications</b>                |                                              |     |                                |      |
| Any post-procedure, pre-discharge complications (1 or more)       | 29                                           | 3.3 | 194                            | 19.9 |
| Major post-procedure, pre-discharge (1 or more of 5 listed below) | 16                                           | 1.8 | 105                            | 10.8 |
| Death (post procedure, pre-discharge)                             | 0                                            | 0   | 20                             | 2.1  |
| Myocardial infarction                                             | 0                                            | 0   | 32                             | 3.3  |
| CVA / Stroke                                                      | 1                                            | 0.1 | 4                              | 0.4  |
| New renal failure                                                 | 0                                            | 0   | 5                              | 0.5  |

|                                                                                |    |     |     |      |
|--------------------------------------------------------------------------------|----|-----|-----|------|
| Unplanned vascular surgery or return to OR                                     | 15 | 1.7 | 53  | 5.4  |
| Other post-procedure, pre-discharge complication (1 or more of 7 listed below) | 28 | 3.2 | 144 | 14.8 |
| Surgical site infection                                                        | 0  | 0   | 29  | 3.0  |
| Graft infection                                                                | 0  | 0   | 0   | 0    |
| Worsening limb ischemia                                                        | 17 | 1.9 | 26  | 2.7  |
| Unanticipated additional intervention                                          | 11 | 1.2 | 21  | 2.2  |
| Vascular access complications (post procedure)                                 | 10 | 1.1 | 5   | 0.5  |
| Blood transfusion (post procedure, pre-discharge)                              | 4  | 0.5 | 52  | 5.3  |
| Other post procedure, pre-discharge complication                               | 7  | 0.8 | 62  | 6.4  |
| <b>Complications post-discharge within 30 days of procedure</b>                |    |     |     |      |
| Any complication post-discharge within 30 days (1 or more)                     | 40 | 4.5 | 185 | 19.0 |
| Major post-discharge complication (1 or more of 3 listed below)                | 14 | 1.6 | 68  | 7.0  |
| Death, post-discharge within 30 days of procedure                              | 2  | 0.2 | 17  | 1.7  |
| Major amputation                                                               | 2  | 0.2 | 12  | 1.2  |
| Unplanned procedure                                                            | 10 | 1.1 | 45  | 4.6  |
| Other post-discharge complication (1 or more of 5 listed below)                | 35 | 4.0 | 161 | 16.5 |
| Surgical site infection                                                        | 3  | 0.3 | 107 | 11.0 |
| Graft infection                                                                | 1  | 0.1 | 6   | 0.6  |
| Worsening limb ischemia                                                        | 25 | 2.8 | 18  | 1.8  |
| Vascular access complications                                                  | 8  | 0.9 | 67  | 6.9  |
| Other post-discharge complication                                              | 1  | 0.1 | 10  | 1.0  |

---
